# Supplementary material
Source: Springer Nature journal article supplement (https://www.springermedizin.de/resource/supplementary/13058_2011_2942_MOESM3_ESM.pdf/9702940)

A

### Therapy (dsDNA damage)

Initial cohort (n = 69)  
18 Patients with PD

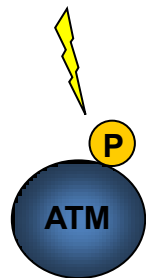

5 *TP53* and *CHK2* wt  
PD-patients with  
low ATM levels

Validation cohort (n = 109)  
10 Patients with PD

4 *TP53* and *CHK2* wt  
PD patients with  
low ATM levels

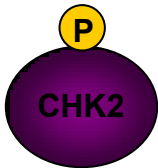

1 PD patient with  
mutations in *CHK2*

2\* PD patient with  
mutations in *CHK2*

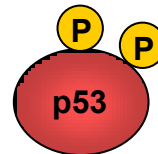

12 PD patients with  
mutations in *TP53*

5\* PD patients with  
mutations in *TP53*

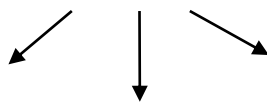

**Apoptosis**

**Growth arrest**

**Senescence**

\* 1 patient with both  
*TP53* and *CHK2* mutation

B

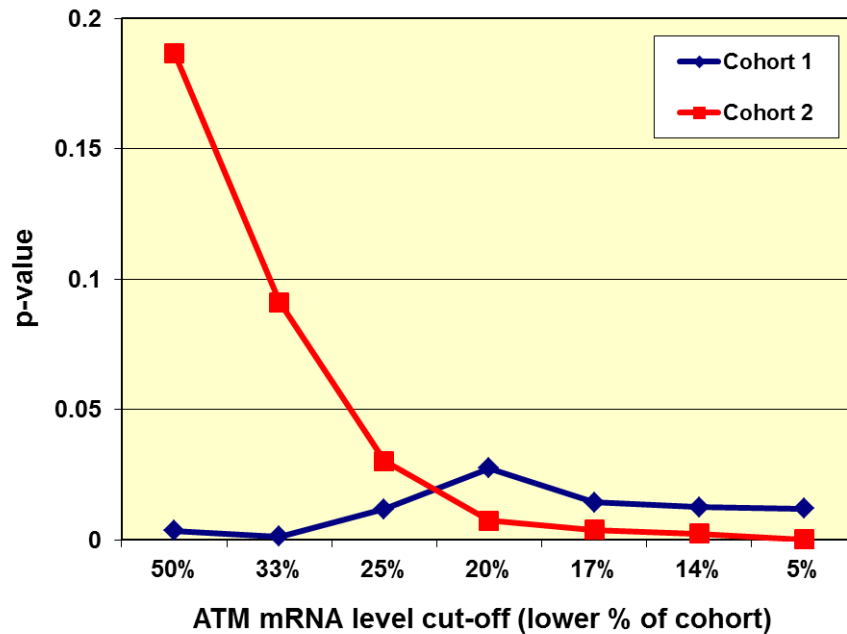

Supplement: MOESM3 [file 9702940]
